# Supplementary material for: Genome-Scale Analysis of Translation Elongation with a Ribosome Flow Model
Source: PubMed Central journal article supplement (PMC3164701; doi:10.1371/journal.pcbi.1002127), 2011-09-01

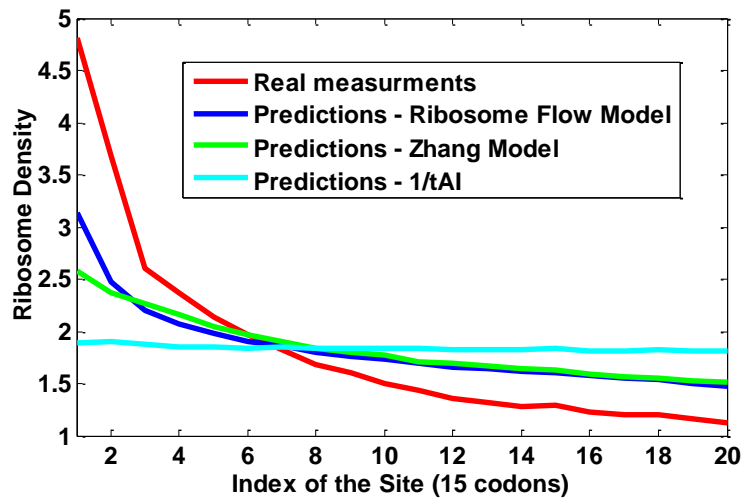

Supplement: pcbi.1002127.s004.pdf [file pcbi.1002127.s004.pdf]
