# Supplementary material for: Genome-Scale Analysis of Translation Elongation with a Ribosome Flow Model
Source: PubMed Central journal article supplement (PMC3164701; doi:10.1371/journal.pcbi.1002127), 2011-09-01
Supplement: pcbi.1002127.s029.pdf [file pcbi.1002127.s029.pdf]

**Text S2: Endogenous genes in *S. cerevisiae*, *S. pombe*, and *E. coli*: correlation of the predicted rates with protein abundance given mRNA levels and the correlation of the predicted rate multiplies by the mRNA levels with protein abundance**

*E. coli* - The correlation with for PA given mRNA:  $R = 0.33$  ( $p = 1.84 \cdot 10^{-11}$ ) for the *RFM* vs.  $R = 0.29$  ( $p = 3.95 \cdot 10^{-9}$ ; 398 genes with PA & mRNA; see Figure S21) for the *tAI*; the correlation of (Rate \* mRNA) with PA ( $r = 0.71$  for the *RFM* vs.  $r = 0.7$  for the *tAI*,  $p < 10^{-16}$  in both cases; see Figure S22);

*S. pombe* - The correlation with PA given mRNA was also higher for the *RFM*,  $R = 0.39$  ( $p < 10^{-16}$ ) vs.  $0.307$  for the *tAI* ( $p < 10^{-16}$ ) for the *tAI* (see Figure S23). The correlation of (Rate \* mRNA) with PA ( $r = 0.7$  for the *RFM* vs.  $r = 0.627$  for the *tAI*,  $p < 10^{-16}$  in both cases ;see Figure S24);

*S. cerevisiae* – The correlation with for PA given mRNA:  $R = 0.32$  for the *RFM* vs.  $0.35$  for the *tAI* ( $p < 10^{-16}$  in both cases; see Figure S25). The correlation of (Rate \* mRNA) with PA:  $0.58$  for the *RFM* vs.  $0.58$  for the *tAI* ( $p < 10^{-16}$  in both cases; see Figure S26). The correlation with PA  $R = 0.49$  for the *RFM* vs.  $0.57$  for the *tAI* ( $p < 10^{-16}$  in both cases).
