# Supplementary material for: Genome-Scale Analysis of Translation Elongation with a Ribosome Flow Model
Source: PLOS journal article supplement (doi:10.1371/journal.pcbi.1002127), 2011-09-01

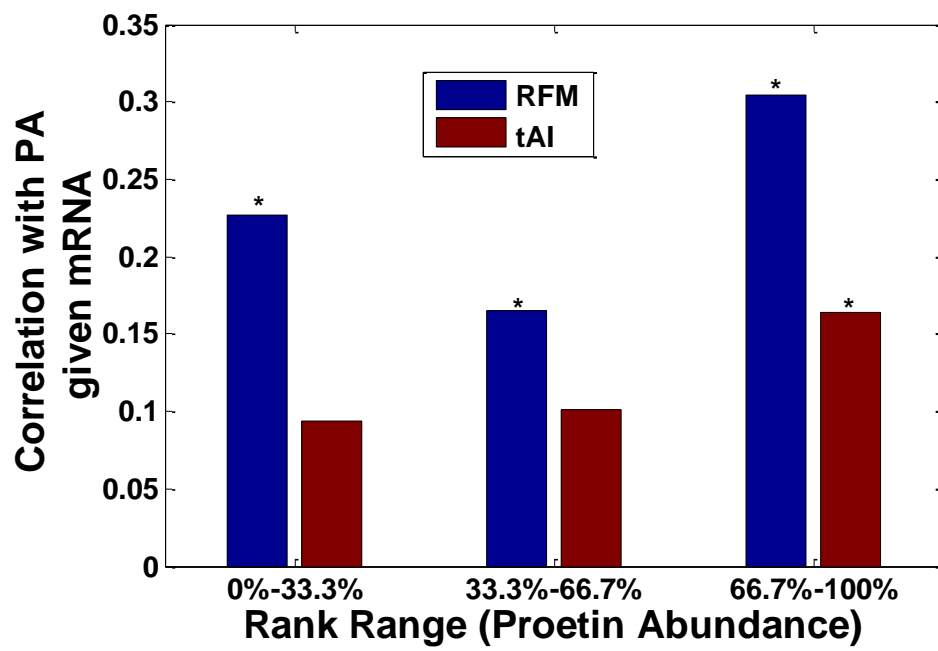

Supplement: S22 (10.1371/journal.pcbi.1002127.s022) [file journal.pcbi.1002127.s022]
