# Supplementary material for: Genome-Scale Analysis of Translation Elongation with a Ribosome Flow Model
Source: PLOS journal article supplement (doi:10.1371/journal.pcbi.1002127), 2011-09-01
Supplement: S33 (10.1371/journal.pcbi.1002127.s033) [file journal.pcbi.1002127.s033]

301 Moved Permanently

# Moved Permanently

The document has moved here.

---

Apache Server at www.ploscompbiol.org Port 80
